1 **Title: Reversible block of cerebellar outflow reveals cortical**  
2 **circuitry for motor coordination**

3 **Authors:** Abdulraheem Nashef<sup>1</sup>, Oren Cohen<sup>1</sup>, Ran Harel<sup>2</sup>, Zvi Israel<sup>3</sup> and Yifat  
4 Prut<sup>1\*</sup>

5  
6 **Affiliations:**

7 <sup>1</sup>Dept. of Medical Neurobiology, IMRIC and ELSC, The Hebrew University, Hadassah  
8 Medical School, Jerusalem, 9112102, Israel

9 <sup>2</sup>Dept. of Neurosurgery, Sheba Medical Center, Tel Aviv, Israel

10 <sup>3</sup>Dept. of Neurosurgery, Hadassah Hospital, Jerusalem, Israel

11

12 \*Correspondence to: [yifatpr@ekmd.huji.ac.il](mailto:yifatpr@ekmd.huji.ac.il)

13

14 Running title: **Cortical circuitry for motor coordination**

15

16

17 Number of Figures: 7

18 Number of Extended Data Figures: 7

19

20

21 **Keywords:** cerebellar-thalamo-cortical; high-frequency stimulation; cerebellar ataxia;  
22 non-human primates; noise correlation; motor timing; inter-joint coordination

23

24

## 25 SUMMARY

26 Coordinated movements are achieved by selecting muscles and activating them at  
27 specific times. This process relies on intact cerebellar circuitry, as demonstrated by  
28 motor impairments triggered by cerebellar lesions. Based on anatomical connectivity  
29 and symptoms observed in cerebellar patients, we hypothesized that cerebellar  
30 dysfunction should disrupt the temporal patterns of motor cortical activity but not the  
31 selected motor plan. To test this hypothesis, we reversibly blocked cerebellar outflow  
32 in primates while monitoring motor behavior and neural activity. This manipulation  
33 replicated the impaired motor timing and coordination characteristic of cerebellar  
34 ataxia. We found extensive changes in motor cortical activity, including a loss of  
35 response transients at movement onset and a decoupling of task-related activity.  
36 Nonetheless, the spatial tuning of cells was unaffected and their early preparatory  
37 activity was mostly intact. These results indicate that the timing of actions, but not the  
38 selection of muscles, is regulated through cerebellar control of motor cortical activity.

39

## 40 HIGHLIGHTS

- 41 • High frequency stimulation blocked cerebellar outflow and impaired motor  
42 behavior
- 43 • Response patterns and coordinated firing of CTC neurons were disrupted
- 44 • The spatial tuning and early preparatory activity of neurons were unaffected
- 45 • Cerebellar control of local and global cortical synchrony supports motor timing

46

## 47 IN BRIEF

48 Nashef et al. used high frequency stimulation to block cerebellar outflow. This  
49 manipulation impaired motor timing and coordination similarly to symptoms found in  
50 cerebellar patients. In parallel, the response patterns of cortical neurons and cell-to-  
51 cell synchronization were altered, yet spatial tuning was maintained. Motor timing  
52 and coordination are regulated by a dedicated cerebellar signal that organizes  
53 execution-related activity of a motor cortical subnetwork.

54

## 55 INTRODUCTION

56 In daily life, well-coordinated and properly timed movements are performed in an  
57 effortless manner. This ability is considered to be in large part mediated by  
58 cerebellar shaping of motor output (Bastian et al., 1996; Beaubaton et al., 1978;  
59 Holmes, 1939; Machado et al., 2015; Meyer-Lohmann et al., 1977; Schlerf et al.,  
60 2007; Spencer et al., 2003). This claim is based on studies of motor behavior in  
61 cerebellar patients (Bastian et al., 1996; Bo et al., 2008; Spencer et al., 2003) which  
62 indicate that these subjects suffer from poor timing of actions (Schlerf et al., 2007;  
63 Spencer et al., 2003) and tend to produce abnormally curved and uncoordinated  
64 movements (Bastian et al., 1996). However, the neural mechanisms through which  
65 the cerebellum controls these motor functions are controlled by the cerebellum are  
66 still unclear.

67 Cerebellar impact on voluntary movements of the upper limb is predominantly  
68 mediated by two pathways. The cerebellar-rubro-spinal tract provides the cerebellum  
69 with fast access to segmental circuitry (Cohen et al., 2017; Garwicz, 2002; Huisman  
70 et al., 1983; Nioche et al., 2009) but its importance diminished considerably over the  
71 course of evolution (Nathan and Smith, 1982; Padel et al., 1981; Schoen, 1964; ten  
72 Donkelaar 1988). By contrast, the cerebellar-thalamo-cortical (CTC) pathway  
73 (Rispaal-Padel et al., 1981) increased in size with evolution and in primates became  
74 the dominant route in mediating the cerebellar control of voluntary movements  
75 (Horne and Butler, 1995). The CTC pathway originates in the deep cerebellar nuclei,  
76 primarily in the dentate nucleus (Wiesendanger and Wiesendanger, 1985), makes  
77 remarkably effective synaptic contacts with the cerebellar-receiving areas of the  
78 motor thalamus (Asanuma et al., 1983a; Asanuma et al., 1983b; Aumann et al.,  
79 1994; Sakai et al., 1996; Shinoda et al., 1982) and terminates extensively throughout  
80 the motor cortex, creating patches of terminations which may extend several  
81 millimeters in the rostrocaudal axis (Shinoda et al., 1993). Cooling the deep  
82 cerebellar nuclei in primate models was shown to trigger behavioral symptoms  
83 similar to those found in cerebellar patients and concomitant changes in motor  
84 cortical activity (Hore and Flament, 1988; Meyer-Lohmann et al., 1975), most of  
85 which involved decreased activity at movement onset. These results indicate that the  
86 CTC system has online access to evolving motor commands and thereby affects  
87 motor actions. However, it remains unclear what features and parameters of the

88 motor command are specifically dictated by the CTC system, and in what way the  
89 loss of the CTC drive, which apparently constitutes only a small fraction of the input  
90 to motor cortical neurons (Bopp et al., 2017), affects the firing of single cells thus  
91 leading to impaired timing and coordination across multiple effectors.

92 To address these questions, we trained two monkeys to perform a center-out  
93 reaching task which relied on predictive timing (Bares et al., 2007; Bo et al., 2008).  
94 Stimulating electrodes were chronically implanted in the superior cerebellar peduncle  
95 (SCP) and recordings were made simultaneously from multiple cortical sites. Single-  
96 pulse stimulation was used to identify motor cortical neurons that are part of the CTC  
97 pathway, and high-frequency stimulation (Agnesi et al., 2013; Agnesi et al., 2015;  
98 Chiken and Nambu, 2016; Dostrovsky and Lozano, 2002) was used to interfere with  
99 the normal flow of information through the pathway. Using this method, we identified  
100 a large number of motor cortical neurons that were part of the CTC system. High  
101 frequency stimulation effectively prevented information flow in the CTC pathway and  
102 produced reversible motor deficits similar to those found in cerebellar patients,  
103 including impaired timing and coordination of movements. The observed behavioral  
104 deficits were preceded by substantial changes in neural activity. Specifically, cortical  
105 cells that were part of the CTC system expressed delayed and sluggish response  
106 onset, but their spatial tuning was unaffected. Changes in the response pattern were  
107 confined to time of movement execution without affecting early stages of motor  
108 preparation. In addition, the signal-dependent noise correlation typically found  
109 between neighboring motor cortical cells was lost. Finally, the well-organized  
110 recruitment order of cells that were recorded from shoulder and elbow-related  
111 cortical sites was disturbed. All these changes in neural activity and behavioral  
112 deficits reversed back to baseline as soon as the stimulation was stopped. These  
113 results suggest that the cerebellar impact on motor cortical activity is not limited to  
114 regulating single cell activity; rather CTC input acts to locally synchronize and  
115 temporally organize the activity of a spatially distributed motor subnetwork. However,  
116 CTC regulation of temporal properties of motor cortical firing operates independently  
117 of the mechanism dictating spatial tuning. The local and global synchrony triggered  
118 by the CTC system can enhance the throughput of cortical units and control motor  
119 timing and coordination.

120

## 121 RESULTS

122 We recorded neural activity from the sensorimotor cortex (**Fig. 1A**) in response to  
123 single-pulse SCP stimulation and while the monkeys performed a center-out  
124 reaching task (**Fig. 1B**). Figure 1C presents the recording maps obtained for the two  
125 monkeys (right and left hemispheres in monkey C and right hemisphere in monkey  
126 M). A high proportion of motor cortical sites across the entire recording area showed  
127 a significant multiunit response to stimulation (68%-73% between monkeys). During  
128 task performance, we recorded neural activity from multiple single cells and  
129 measured their task-related activity (**Fig. 1D**) and response to SCP stimulation (**Fig.**  
130 **1E**). The onset time and response pattern expressed by cortical cells in response to  
131 SCP stimulation was similar to our previous findings (Nashef et al., 2018) and  
132 consistent with the di-synaptic impact of SCP stimulation on cortical cells.

133 **High frequency SCP stimulation interrupts the transmission of information in**  
134 **the CTC pathway.** Studying the cerebellar impact on motor cortical activity can  
135 benefit from comparing neural activity obtained when blocking the flow of information  
136 in the CTC pathway to the baseline level. Previous studies have used dentate  
137 cooling to identify cerebellar involvement in motor cortical activity and motor behavior  
138 (Flament and Hore, 1986; Meyer-Lohmann et al., 1975). However, this approach  
139 cannot dissect the underlying circuitry that mediates the observed deficits. In addition,  
140 it is difficult to estimate the efficiency of this manipulation in blocking information flow  
141 through the CTC pathway. Instead, we implemented the commonly used high  
142 frequency stimulation protocol that was shown to interfere with ongoing, often  
143 pathological patterns of neural activity (Benabid et al., 1991; Hodaie et al., 2002;  
144 Limousin et al., 1998; Torres et al., 2010). We applied the same stimulation protocol  
145 through the SCP electrode and relied on the fact that synaptic transmission cannot  
146 follow this high frequency activation pattern (Agnesi et al., 2015; Iremonger et al.,  
147 2006; Wang and Kaczmarek, 1998; Zucker and Regehr, 2002). To verify the  
148 negative effect of HFS on information transfer, we tested the changes in neural  
149 response to SCP stimulation when using HFS as compared to low frequency  
150 stimulation. Figure 2A presents an example of a neural response to single-pulse  
151 SCP stimulation exhibited by a cortical cell. In this example, the stimulation triggered  
152 a response in a large fraction of the sweeps. However, when the same stimulus was  
153 applied at a higher frequency (**Fig. 2B**), the tight contingency between the stimulus

154 and the single cell response was lost. This change in response to stimulation is  
155 clearly apparent in the raster plot and the peri-stimulus time histogram (PSTH)  
156 computed for that cell (**Fig. 2C**). Across the population, SCP-responsive cells had a  
157 significantly weaker response to stimuli applied during high frequency stimulation  
158 than to a single pulse stimulation applied at the same intensity level. This is shown in  
159 the stimulus-triggered mean rate for responsive cortical cells (**Fig. 2D**) for single  
160 pulse (black trace), HFS (red trace) and the baseline level computed using artificially  
161 injected “stimulation times” in control trials (surrogate - blue trace). Computing the  
162 baseline level in this manner ensured that both rate measures (baseline and post-  
163 stimulus) were similarly affected by the task-related rate modulation. We further  
164 quantified this reduction in response magnitude by calculating the firing rate during  
165 the 6 ms following the stimulation pulses (for single pulse stimulation, HFS protocol,  
166 and control trials). As expected, during single-pulse stimulation, the firing rate of the  
167 cortical cells increased compared to the baseline level (**Fig. 2E**). This was expected  
168 since we only tested cells that were responsive to SCP stimulation. However, during  
169 HFS, the post-stimulus firing rate of responsive cells declined considerably  
170 compared to the single pulse stimulation (Wilcoxon signed-rank;  $p < 0.001$ ) even  
171 though we used the same stimulus intensity and only changed the stimulation  
172 frequency. In fact, the post-stimulus response area (i.e., the number of additional  
173 spikes triggered by the stimulus) for cortical cells dropped to 86.4% during HFS  
174 compared to the single pulse stimulation. Further, during the HFS trials, the post-  
175 stimulus rate of the cortical cells was similar to the baseline rate computed when no  
176 stimulation was applied (**Fig. 2E**,  $p < 0.49$ ). Finally, in a separate study conducted on  
177 a third monkey we tested the frequency-dependency of response suppression and  
178 found that it occurred at frequencies exceeding 30 Hz (**Fig. S1**). This result is  
179 consistent with findings obtained *in vitro* (Gornati et al., 2018) showing that the  
180 transmission between the cerebellar and motor thalamus is suppressed during high  
181 frequency stimulation. We argue that the observed response suppression during  
182 HFS can be considered as a practical and efficient block of the CTC pathway. This  
183 conclusion is based on the argument that a single SCP stimulation pulse can be  
184 viewed as a highly-synchronous packet of spikes that propagates through the SCP  
185 to the motor thalamus. This synchronous activation contrasts with the innate  
186 activation of the system which is expected to be relatively sparse, slow and less  
187 efficient in triggering a post-synaptic response. Therefore, the pronounced drop in

188 single cell response to the highly potent SCP activation provides an upper bound on  
189 the actual information transfer through the pathway during this time. Taken together,  
190 these results suggest that HFS efficiently blocked the flow of information from the  
191 cerebellar output to the motor cortex.

192 **High-frequency stimulation alters timing and coordination of reaching**  
193 **movements.** We found that motor behavior was modified considerably during HFS  
194 trials. Figure 3A shows an example of a single recording session in which hand  
195 trajectories became more variable during HFS trials than in control trials. We  
196 quantified the change in motor performance using the response and movement  
197 times computed for each trial based on the trajectory (**Fig. 3B**). For this analysis we  
198 only considered correctly performed trials and since task design encouraged the  
199 monkey to predict the onset time of the go signal, the response time (RT - time  
200 between “Go” signal and movement onset) was often negative. During HFS, the  
201 mean trajectory across all sessions was longer and more variable, as seen in the  
202 plots for the mean and standard deviation of the center-to-target movement traces  
203 (**Fig. 3C**). Response time increased significantly (from -183.3 ms during control to -  
204 133.1 ms during HFS, paired t-test,  $p < 0.001$ ), as did movement time (from 446.9 ms  
205 to 517.3 ms, paired t-test,  $p < 0.001$ ); the path length was longer (from 4.19 cm to  
206 4.53 cm;  $p < 0.02$ ), and velocity decreased (from 10.34 cm/s to 9.74 cm/s;  $p < 0.001$ )  
207 for trials performed during HFS (**Fig. 3D**). These changes in motor behavior reversed  
208 back to the baseline level when HFS was halted (washout bars in **Fig. 3D**). In  
209 contrast to the effect of HFS on motor behavior, the single pulse stimulation protocol  
210 had no effect on motor behavior despite its impact on many motor cortical cells (**Fig.**  
211 **3D**, black bars). These findings suggest that when stimuli are applied at low  
212 frequencies, the brief overt activation caused by SCP stimulation is insufficient to  
213 alter motor behavior; rather, the temporary block of information flow in the CTC  
214 pathway that takes place during high frequency stimulation is responsible for the  
215 observed effects.

216 Previous studies have suggested that cerebellar involvement is particularly important  
217 in controlling inter-joint coordination (Bastian et al., 1996; Goodkin et al., 1993;  
218 Holmes, 1939; Thach et al., 1993; Thach et al., 1992). We therefore tested the effect  
219 of HFS on the elbow-to-shoulder coordination required to perform the behavioral task  
220 used in this study. We took advantage of the exoskeleton system (Scott, 1999) worn

221 by the monkeys that continuously recorded their elbow and shoulder motions.  
222 Previous studies have reported that cerebellar patients tend to exhibit curved hand  
223 trajectories (Deuschl et al., 2000; Martin et al., 2000). We computed the curvature  
224 index (Deuschl et al., 2000), which quantifies the average distance of the trajectory  
225 from a straight line connecting the same start and end points. During HFS trials the  
226 curvature index increased significantly compared to the control trials (**Fig. 4A**;  $p < 10^{-10}$ ,  
227 Wilcoxon's signed-rank). These results show that applying HFS further replicates  
228 deficits in motor coordination similar to those shown in cerebellar patients, in a  
229 reversible manner.

230 Next, we measured changes in movement kinematics between the control and HFS  
231 trials. Figure 4B illustrates shoulder and elbow velocity profiles recorded in a single  
232 control (solid lines) and HFS (dashed line) trials that were directed to a single target  
233 and the kinematic parameters used to quantify these movements. We found that  
234 during the HFS trials, both the shoulder and elbow peak velocity decreased  
235 significantly (**Fig. 4C**; Shoulder:  $140.1 \pm 4.47$  °/s to  $120.5 \pm 3.33$  °/s, paired t-test:  
236  $p < 0.001$ ; Elbow:  $182.7 \pm 18.51$  °/s to  $157 \pm 13.6$  °/s, paired t-test:  $p < 0.001$ ). Further, the  
237 onset time of the shoulder and elbow movements increased significantly during HFS  
238 trials (**Fig. 4D** and **Fig. S2** shoulder:  $34.6 \pm 6.3$  ms increase, paired t-test,  $p < 0.001$ ;  
239 elbow:  $38.1 \pm 6.6$  ms increase,  $p < 0.001$ ). Finally, the difference between the onset  
240 times of the two joints increased as well (**Fig. 4E** and **Fig. S2**;  $69.4 \pm 4.1$  ms to  
241  $97.4 \pm 6.9$  ms,  $p < 0.001$ ), suggesting that during HFS trials, not only was movement  
242 onset delayed but also the shoulder and elbow joints tended to be activated in a  
243 more isolated manner, as often found in ataxic patients (Bastian et al., 1996; Becker  
244 et al., 1990). These results suggest that motor behavior in HFS trials exhibits similar  
245 impairments as found in cerebellar patients, further supporting the efficiency of the  
246 HFS protocol in blocking cerebellar outflow.

247 **HFS modifies the movement-related activity of CTC neurons in a manner**  
248 **correlated with and predictive of behavioral changes.** After verifying that HFS  
249 prevented the normal flow of CTC information and induced considerable changes in  
250 motor behavior, we examined the changes in neuronal activity which occurred at the  
251 same time and inspected their role in mediating the behavioral impairments. This  
252 was done by comparing the task-related activity of cortical neurons that were part of  
253 the CTC system during HFS and the control trials. CTC neurons were defined based



254 on their significant, excitatory responses to SCP stimulation (Nashef et al., 2018).  
255 Figure 5 presents the activity of one such cell (**Fig 5A**) and its preferred direction  
256 (**Fig. 5B**) during control (blue) and HFS (red) trials. The cell was identified as part of  
257 the CTC system based on its early excitatory response to SCP stimulation (see inset  
258 in **Fig 5A**). In this example, the movement-related activity of the neuron during HFS  
259 trials lacked the transient firing at movement onset that occurred during control trials.  
260 Despite the change in the response profile, the preferred direction of the cell  
261 remained the same. Across the population, cells that were both responsive to SCP  
262 stimulation and directionally tuned during the control trials (n=57) expressed a  
263 consistent tendency to exhibit more sluggish response profiles during HFS trials  
264 (**Fig. 5C**). The weaker activation was not an outcome of a general decrease in the  
265 neuronal firing rate during HFS trials since the pre-cue firing of the cells was not  
266 significantly different between the HFS and control trials (**paired t-test, p=0.24**). In  
267 addition, despite the change in response profile of neurons, there was no significant  
268 change in the PD between HFS and the control trials (**Fig. 5D**, mean  $\Delta$ PD = 0.24  
269 rad,  $p < 0.59$ , one-sample test for mean direction).

270 If the phasic firing at movement onset is the result of the CTC drive, the SCP-  
271 responsive neurons should exhibit the greatest decrease in firing rate during HFS  
272 trials (compared to non-responsive cells). We tested this hypothesis and found that  
273 although both responsive (**Fig. 5C,E**) and non-responsive neurons reduced their  
274 transient firing rate around movement onset, the rate reduction observed for  
275 responsive units was significantly larger than for non-responsive cells (**Fig. 5F**). This  
276 suggests that the effect of the HFS on behavior was predominantly mediated by the  
277 cortical neurons that are part of the CTC system. Importantly, it should be noted that  
278 the observed changes in task-related activity of the neurons recorded during HFS  
279 trials preceded the changes in muscle activity considerably (**Fig. S3**) such that the  
280 changes in neural activity could not simply be a reflection of the altered sensory  
281 feedback triggered by the impaired motor performance. We further confirmed that  
282 the changes in cortical activity and motor behavior were not specific to the behavioral  
283 paradigm used in this study. To do so, we applied HFS in a monkey that was trained  
284 to perform an isometric, single joint, delayed-response paradigm (Cohen et al., 2017;  
285 Nashef et al., 2018). HFS in this task affected motor behavior and cell activity in a  
286 manner similar to the findings reported here (**Fig. S4**), suggesting a general impact

287 of HFS on movement-related activity, irrespective of the context in which movements  
288 are performed.

289 The impact of CTC system on movement onset raises the question of possible  
290 differences in CTC impact between the primary and premotor areas. Many studies  
291 have implicated the premotor areas in initiating movements (Kaufman et al., 2014;  
292 Mazurek and Schieber, 2017). Since HFS modified movement onset time  
293 considerably, we tested whether premotor neurons were uniquely affected by this  
294 manipulation. To do so, we divided the M1 and PM neurons that responded to SCP  
295 stimulation based on the peak time of their task-related activity into early (peak  
296 response before movement onset) and late (peak response after movement onset)  
297 cells (**Fig. 6A**). We found that although the majority of PM cells had an early peak  
298 response (as might be expected), fewer were responsive to SCP stimulation (**Fig.**  
299 **6B**), compared to late PM cells (chi-square test,  $p < 0.02$ ). Moreover, the effect of  
300 HFS on early PM cells was considerably weaker compared to its effect on late PM  
301 cells (**Fig. 6C**). In contrast, for M1 neurons, both groups of cells (early and late) were  
302 comparably affected during the HFS trials both in terms of the fraction of SCP-  
303 responsive cells and the magnitude of HFS impact on their task-related activity (**Fig.**  
304 **6B,D**). This suggests that the effect of HFS is not evenly distributed both in space  
305 (M1 vs. PM) nor in time; rather, the CTC system targets execution-related cells and  
306 its impact is strongest around movement onset.

307 **Motor impairments during HFS trials are accompanied by local and global**  
308 **neuronal desynchronization.** Applying HFS not only impeded movement onset but  
309 also impaired motor coordination. To identify the neural correlates of motor  
310 incoordination, we measured the neural interactions during the control and HFS  
311 trials. First, we estimated the noise correlation between simultaneously recorded  
312 neurons (**Fig. 7**). During the control trials, neighboring neurons (recorded by the  
313 same electrode) expressed a significant trial-to-trial rate co-variation (i.e., a positive  
314 noise correlation), especially when they shared similar tuning properties (i.e., had a  
315 positive signal correlation, **Fig. 7A**). This finding is similar to previous reports on  
316 motor cortical neurons (Lee et al., 1998). However, during HFS trials, the noise  
317 correlation between neighboring neurons decreased and no longer differed from zero  
318 (**Fig. 7B**); specifically, the firing of neighboring neurons became independent,  
319 despite the fact that the signal correlation remained the same (**Fig. 7C**). This result

320 suggests that although the directional tuning of neurons was unaffected when flow of  
321 information in the CTC pathway was impaired, the local trial-to-trial synchrony was  
322 reduced in a way that was seemingly at odds with the increased behavioral variability  
323 characterizing HFS trials. Here again, the effect was stronger for responsive SCP  
324 than non-responsive neurons (**Fig. S5**).

325 Further, the loss of neural correlation also affected remotely located neurons. As  
326 proper performance of the task required shoulder-to-elbow coordination, we tested  
327 the specific relationships in responses between neurons recorded from shoulder and  
328 elbow-related sites during the control and HFS trials (**Fig. 7D-F**). Site identity was  
329 defined by the observed joint movement in response to intracortical microstimulation.  
330 We computed the pairwise response correlation between neurons recorded at  
331 elbow-related and shoulder-related sites. Since we searched for consistent temporal  
332 relations between activity patterns, for each pair of cells, we used the peak response  
333 time of the shoulder-related neuron (see Methods) as an aligning event when  
334 computing the peri-event time histogram (PETH) of the two cells. We then averaged  
335 the pairwise response correlation matrices across all available pairs. During the  
336 control trials (**Fig. 7D**), we found that the response correlation varied along the trial,  
337 but was maximal at positive latencies (i.e., after the peak time of the shoulder-related  
338 cell). For each point along the trial, the maximal correlation was obtained at different  
339 shoulder-to-elbow time lags. For instance, at  $t=0$  (peak shoulder activity) the maximal  
340 correlation was at positive time lags (i.e., when the elbow-related activity lagged  
341 about 200 ms behind the shoulder related activity). This suggests a consistent  
342 temporal organization of neural activity as concerns task-related joints (shoulder and  
343 elbow). By contrast, during HFS trials (**Fig. 7E**), the temporal relations between the  
344 response profile of the shoulder and elbow units was lost both along the trial, and  
345 across different inter-unit lags. A quantitative examination of the changes in the  
346 pairwise response correlations revealed that during HFS, the value of the peak  
347 correlation decreased significantly (**Fig. 7F, top**, paired t-test,  $p < 0.00012$ ) and the  
348 peak time appeared more variable and uncorrelated with the peak time computed  
349 during control trials (**Fig. 7F, bottom**, Spearman correlation = -0.08, ns). For  
350 comparison, we computed the response correlation between pairs of neurons  
351 irrespective of their somatotopic affiliation (**Fig. S6A-C**). Here, there were no  
352 temporally organized activation patterns during the control or the HFS trials. The

353 same result was obtained when computing the correlation between the shoulder-  
354 related neurons and neurons from task-irrelevant joints (i.e. wrist or fingers, **Fig.**  
355 **S6D-I**), indicating that the observed temporal correlation of activity was highly  
356 dependent on the somatotopic identity of the tested neurons. Finally, we applied the  
357 same analysis, but using movement onset (instead of shoulder peak time) as an  
358 alignment event (**Fig. S7**). Here we obtained similar results, but the correlations  
359 values during the control trials were lower than those found when aligning on  
360 response peak time, indicating that the correlation matrices indeed measured the  
361 temporal locking of joint-related activity (which varied across trials in relation to  
362 movement onset). Taken together, these results suggest that in the absence of  
363 cerebellar input to the motor cortex, there is a spatiotemporal disorganization of  
364 motor cortical activity at the cell-to-cell level. This uncorrelated network activity is  
365 likely to underlie the uncoordinated movements that were observed during this time.

366

## 367 DISCUSSION

368 The cerebellar-thalamo-cortical pathway (CTC) has long been considered a  
369 necessary component for executing well-timed and coordinated movements (Hore  
370 and Flament, 1988; Ivanusic et al., 2005; Proville et al., 2014). However, the  
371 mechanisms used by this system to control the properties of motor actions are not  
372 fully understood. Here we addressed this question by identifying the cortical  
373 components of the CTC system in behaving primates and by manipulating the flow of  
374 information through this pathway in a rapid but reversible manner. The behavioral  
375 consequences of this interference replicated symptoms of cerebellar ataxia,  
376 including longer response and movement times, curved movements and reduced  
377 inter-joint coordination. At the same time, neural activity was modified compared to  
378 the control trials, with a particularly pronounced suppression of task-related firing  
379 transients in the cortical neurons that were part of the CTC system and a loss of cell-  
380 to-cell synchrony in a manner consistent with the lack of motor coordination. The  
381 modification of cell activity was confined around movement execution, whereas the  
382 spatial tuning and early preparatory activity in premotor areas were unaffected.  
383 These results suggest that the CTC volley controls motor timing by synchronizing  
384 neurons both locally and globally. Local synchrony may contribute to the formation of  
385 firing transients which are effective in recruiting downstream elements and

386 enhancing motor cortical throughput. The global synchrony which was found across  
387 task-related joints may support the appropriate temporal organization and the  
388 coupling of relevant effectors needed to execute specific motor tasks. Taken  
389 together, these actions of the CTC system facilitate rapid and coordinated motor  
390 execution, but are likely to have little role in the emergence of the motor plan.

391 Previous studies on the role of the CTC system in motor control have  
392 examined the functional implications of cerebellar deficits in human patients (Bastian  
393 et al., 1996; Bo et al., 2008; Deuschl et al., 2000; Spencer et al., 2003) or in primates  
394 where the dentate nucleus of the cerebellum was inactivated using a cooling probe  
395 (Beaubaton et al., 1978; Hore and Flament, 1988; Meyer-Lohmann et al., 1975).  
396 These studies provided invaluable information about the motor and neural  
397 consequences of cerebellar ataxia, but did not attempt to identify the set of neurons  
398 that constitute the CTC system or how the loss of the CTC drive affects single cell  
399 activity and leads to motor impairment. Here we utilized the anatomical organization  
400 of the CTC pathway and developed a new method to study the CTC system by using  
401 a chronically implanted SCP electrode. Targeting the SCP and not the cerebellar  
402 receiving motor thalamus provided a more specific access to the CTC pathway  
403 without recruiting neighboring thalamic nuclei. This type of confounding effect of  
404 intra-thalamic stimulation is a likely outcome, given the complex anatomy of the  
405 motor thalamus (Percheron et al., 1996). In fact, recent studies have suggested that  
406 the SCP is potentially a more efficient target for deep brain stimulation when treating  
407 essential tremor (Fenoy and Schiess, 2017).

408 The selected frequency of stimulation for the HFS was based on protocols  
409 commonly applied during stimulation of deep brain structures to treat neural  
410 disorders such as Parkinson's disease (Benabid et al., 1991; Limousin et al., 1998).  
411 The effectiveness of the CTC block during HFS was clear from the fact that the  
412 cortical cells which were responsive to single pulse stimulation became non-  
413 responsive when the same stimulation pulses were applied at a high frequency.  
414 Since we stimulated a fiber tract, the block of information flow during HFS was  
415 probably due to the general inability of synaptic contacts to faithfully follow such  
416 repetitive activation (Wang and Kaczmarek, 1998; Zucker and Regehr, 2002). These  
417 findings are consistent with a recent report (Gornati et al., 2018) showing that the  
418 cerebello-thalamic transmission itself is blocked when activated at high frequencies.

419 This suggests that high frequencies, SCP stimulation is an efficient method for  
420 blocking information transfer through the CTC system in a way which can be rapidly  
421 reversed when the stimulation is halted.

422 The behavioral consequences of the block of CTC information flow were  
423 similar to the symptoms of cerebellar ataxia. Cerebellar patients exhibit several  
424 stereotypical changes in motor behavior (Bastian et al., 1996; Diener and Dichgans,  
425 1992; Holmes, 1939) including increased reaction time (Holmes, 1939; Schlerf et al.,  
426 2007; Tsujimoto et al., 1993), asymmetric movements (Diener and Dichgans, 1992;  
427 Holmes, 1939; Hore et al., 1991), decreased movement velocity (Bastian et al.,  
428 1996; Deuschl et al., 2000), end-point error and target overshooting (Bastian et al.,  
429 1996; Deuschl et al., 2000), decomposition of movement (Bastian et al., 1996;  
430 Becker et al., 1990) and tremor (Carrea and Mettler, 1955; Deuschl et al., 2000;  
431 Holmes, 1917, 1939). Motor coordination is specifically impaired in cerebellar  
432 patients (Bastian et al., 1996) as can be seen in the extensive deficits of these  
433 patients when performing multi-joint compared to single joint movements (Goodkin et  
434 al., 1993; Holmes, 1939; Thach et al., 1992). Most of these symptoms were  
435 replicated in the motor behavior of the monkeys during HFS trials; namely, response  
436 time and movement time increased, and movement velocity decreased. Since we  
437 used a shoulder-elbow reach paradigm we were able to test the impact of HFS on  
438 motor coordination. During HFS, the latency between the activation of the shoulder  
439 and elbow joints increased, suggesting a decomposition of movement. In addition,  
440 the synchrony between the shoulder and elbow joints was more variable and the  
441 movement became more curved. All these changes have been reported in cerebellar  
442 patients (Bastian et al., 1996; Becker et al., 1990; Deuschl et al., 2000).

443 The altered motor behavior observed during HFS trials was accompanied by  
444 substantial changes in neuronal firing patterns. One of the major changes in single  
445 cell activity during HFS was the loss of the phasic component of the response profile  
446 at movement onset. This change was consistent with the delayed onset and slower  
447 velocity of the action. Nonetheless, the change in firing considerably preceded  
448 muscle activity and movement. This suggests that the observed modification was in  
449 fact the source rather than the outcome of the poorly performed movements. Similar  
450 results have been found in studies that induced ataxic behavior using dentate  
451 cooling (Hore and Flament, 1988). Here we corroborate and extend these findings by

452 specifically identifying motor cortical neurons that were part of the CTC system, as  
453 we first reported in a previous study (Nashef et al., 2018). The effect of rate change  
454 was particularly pronounced for these cells compared to non-responsive cells. This  
455 result directly implicates the CTC system in generating the firing transient at  
456 movement onset during normal motor behavior. This finding is also noteworthy as it  
457 indicates that the net impact of the TC input to the motor cortex exceeds the  
458 expected impact based on the low fraction of synaptic contacts made by the TC  
459 system on motor cortical cells (Bopp et al., 2017). Finally, despite the changes in  
460 response profile during HFS, the directional tuning of the cells remained the same.  
461 This strongly indicates that the spatial and temporal properties of motor cortical  
462 neurons are dictated by independent sources of information.

463 We also investigated the neural correlates of motor coordination (and its  
464 disintegration during HFS) at the level of the motor cortical network. The anatomy of  
465 the motor TC system seems to be specifically suited to coordinating motor actions  
466 (Horne and Butler, 1995) since a single TC fiber can generate multiple patches of  
467 terminals across several millimeters in the rostrocaudal axis (Shinoda et al., 1993).  
468 This contrasts with the spatially confined and locally dense distribution of TC  
469 terminals in the somatosensory system (Jones, 1983). These differences may reflect  
470 the different tasks and constraints the two systems face: whereas somatosensory  
471 information is transmitted in a way that preserves the somatotopic map, the motor  
472 TC system needs to coordinate several spatially distributed effectors during task  
473 performance. Our results highlight the possible neural correlates that correspond to  
474 the organization of the TC system and its contribution to motor coordination. Locally,  
475 we found that neighboring cells are correlated in a signal-dependent manner,  
476 consistent with previous reports (Lee et al., 1998). More globally, we found a  
477 temporal organization in the activation of joint-related sites. These two measures of  
478 neural coordination were lost during HFS, together with the deterioration in motor  
479 coordination.

480 In the motor cortex, the synchrony between neurons was reported to be linked with  
481 the similarity in directional tuning (Lee et al., 1998), shared muscle fields (Jackson et  
482 al., 2003) or specific motor states (Baker et al., 2001). All these findings appear to  
483 imply that neurons that share common features are likely to exhibit rate-based  
484 synchrony. The source for this rate covariation has not been explored directly, but it

485 is assumed that either shared input and/or local recurrent interactions via  
486 intracortical axon collaterals are responsible for locally synchronized firing (Lee et al.,  
487 1998). The finding that during HFS the pairwise noise correlation between nearby  
488 neurons was by and large lost but the signal correlation was unaffected implies that  
489 at least part of this correlated noise among nearby units originates from CTC input  
490 which is independent of the directional tuning of the cells. The involvement of  
491 thalamic input in synchronizing the firing of cortical cells is the subject of  
492 considerable debate. In the somatosensory cortex, some have argued that common  
493 input may be sufficient to induce such synchrony (Bruno and Sakmann, 2006)  
494 whereas others have highlighted the role of intra-cortical processing for the observed  
495 synchrony (Cohen-Kashi Malina et al., 2016). Our results suggest that the interaction  
496 between these two sources of input (thalamic and cortical) is required for maintaining  
497 neural synchrony, such that in the absence of any of these inputs the cell-to-cell  
498 correlation is lost. The cortical synchrony supported by the TC system can account  
499 for the impact of the CTC system on cell firing, which extends beyond the anatomical  
500 connectivity alone.

501 In studying the relations between noise correlation and tuning similarity, a  
502 significantly positive noise correlation was only found between nearby neurons  
503 recorded by the same electrode (Lee et al., 1998). We speculate that documenting  
504 cells located at different patches that are formed along the trajectory of a single TC  
505 pathway would reveal remotely located cortical cells with positive noise correlations.  
506 We could not test this hypothesis directly, but we found that cortical cells that were  
507 recorded from the shoulder and elbow sites expressed a temporally organized  
508 response profile that was lost during HFS. Previous studies have reported large-  
509 scale propagating waves in the motor cortex that encode task parameters (Riehle et  
510 al., 2013; Rubino et al., 2006) and were related to motor initiation (Best et al., 2017).  
511 Studies have also shown that on average, the activation times of muscles and joint-  
512 related motor cortical cells occurs sequentially (from proximal to distal) with a large  
513 degree of overlap in onset times (Murphy et al., 1985). We extend this argument by  
514 suggesting that the temporal relations between remote sites that are related to  
515 different joints could be a way for the CTC system to control the timely activation  
516 required for multi-joint movements. In the absence of the CTC drive, these temporal  
517 relations are lost and the ability to properly coordinate different joints is impaired.



518 Motor coordination was claimed to be the ability to exploit torques at one joint that  
519 were generated in moving another coupled joint (Bastian et al., 1996; Bastian et al.,  
520 2000). Hence, at the neural level, these torque interactions may be mediated by trial-  
521 to-trial synchronization across distinct populations of cells.

522 In summary, physiological and anatomical studies have shown that the CTC  
523 pathway is an extremely potent system with a broad motor cortical termination  
524 pattern. We showed that one of the functional implications of this organizational  
525 scheme is the synchronized recruitment of a motor cortical subnetwork composed of  
526 task related neurons that triggers and organizes the activation of its associated  
527 effectors in a timely manner. The synchrony produced by this pathway can  
528 potentially exert a strong impact on downstream elements. Previous studies have  
529 highlighted the importance of motor cortical synchrony for efficient recruitment of  
530 muscles (Baker et al., 2001; Jackson et al., 2003; Vaadia et al., 1995; Yanai et al.,  
531 2007). Our findings suggest that the CTC system may be an important cause and  
532 orchestrator of this synchrony.

533

#### 534 **ACKNOWLEDGMENTS**

535 This study was funded by the Israel Science Foundation (ISF-1787/13). Additional  
536 funding was received from the German Israeli Foundation (GIF, grant I-1224-  
537 396.13/2012), the Jerusalem Brain Center (AN) and through the generous support of  
538 the Baruch Foundation (YP).

539

#### 540 **AUTHOR CONTRIBUTIONS**

541 Y.P. conceived the study, A.N., O.C., Z.I. and R.H. performed the experiment, A.N.  
542 analyzed the data, Y.P. and A.N. wrote the manuscript.

543

#### 544 **DECLARATION OF INTERESTS**

545 The authors declare no competing interests.

546

547

548

## 549 REFERENCES

- 550 Agnesi, F., Connolly, A.T., Baker, K.B., Vitek, J.L., and Johnson, M.D. (2013). Deep Brain  
551 Stimulation Imposes Complex Informational Lesions. *Plos one* 8, 11.
- 552 Agnesi, F., Muralidharan, A., Baker, K.B., Vitek, J.L., and Johnson, M.D. (2015). Fidelity of  
553 frequency and phase entrainment of circuit-level spike activity during DBS. *Journal of*  
554 *neurophysiology* 114, 825-834.
- 555 Asanuma, C., Thach, W., and Jones, E. (1983a). Anatomical evidence for segregated focal  
556 groupings of efferent cells and their terminal ramifications in the cerebellothalamic pathway  
557 of the monkey. *Brain research* 286, 267-297.
- 558 Asanuma, C., Thach, W.T., and Jones, E.G. (1983b). Distribution of cerebellar terminations  
559 and their relation to other afferent terminations in the ventral lateral thalamic region of the  
560 monkey. *Brain research* 286, 237-265.
- 561 Aumann, T., Rawson, J., Finkelstein, D., and Horne, M. (1994). Projections from the lateral  
562 and interposed cerebellar nuclei to the thalamus of the rat: a light and electron microscopic  
563 study using single and double anterograde labelling. *J Comp Neurol* 349, 165-181.
- 564 Baker, S., Spinks, R., Jackson, A., and Lemon, R. (2001). Synchronization in Monkey Motor  
565 Cortex During a Precision Grip Task. I. Task-Dependent Modulation in Single-Unit  
566 Synchrony. *Journal of neurophysiology* 85, 867-885.
- 567 Bares, M., Lungu, O., Liu, T., Waechter, T., Gomez, C.M., and Ashe, J. (2007). Impaired  
568 predictive motor timing in patients with cerebellar disorders. *Experimental brain research*  
569 180, 355-365.
- 570 Bastian, A.J., Martin, T.A., Keating, J.G., and Thach, W.T. (1996). Cerebellar Ataxia:  
571 Abnormal Control of Interaction Torques Across Multiple Joints *Journal of neurophysiology*  
572 76, 18.
- 573 Bastian, A.J., Zackowski, K.M., and Thach, W.T. (2000). Cerebellar ataxia: torque deficiency  
574 or torque mismatch between joints? *J Neurophysiol* 83, 3019-3030.
- 575 Beaubaton, D., Trouche, E., Amato, G., and Grangetto, A. (1978). Dentate cooling in  
576 monkeys performing a visuo-motor pointing task. *neuroscience letters* 8, 225-229.
- 577 Becker, W.J., Kunesch, E., and Freund, H.-J. (1990). Coordination of a Multi-Joint  
578 Movement in Normal Humans and in Patients with Cerebellar Dysfunction. *Canadian Journal*  
579 *of Neurological Sciences* 17, 264-274.
- 580 Benabid, A., Pollak, P., Gervason, C., Hoffmann, D., Gao, D., Hommel, M., Perret, J., and  
581 Rougemont, J.d. (1991). Long-term suppression of tremor by chronic stimulation of the  
582 ventral intermediate thalamic nucleus. *Lancet* 377, 403-406.
- 583 Best, M.D., Suminski, A.J., Takahashi, K., Brown, K.A., and Hatsopoulos, N.G. (2017).  
584 Spatio-Temporal Patterning in Primary Motor Cortex at Movement Onset. *Cereb Cortex* 27,  
585 1491-1500.
- 586 Bo, J., Block, H.J., Clark, J.E., and Bastian, A.J. (2008). A cerebellar deficit in sensorimotor  
587 prediction explains movement timing variability. *Journal of neurophysiology* 100, 2825-2832.
- 588 Bopp, R., Holler-Rickauer, S., Martin, K.A.C., and Schuhknecht, G.F.P. (2017). An  
589 Ultrastructural Study of the Thalamic Input to Layer 4 of Primary Motor and Primary  
590 Somatosensory Cortex in the Mouse. *The Journal of neuroscience : the official journal of the*  
591 *Society for Neuroscience* 37, 2435-2448.

- 592 Bruno, R.M., and Sakmann, B. (2006). Cortex is driven by weak but synchronously active  
593 thalamocortical synapses. *Science* 312, 1622-1627.
- 594 Carrea, R.M.E., and Mettler, F.A. (1955). Function of the primate brachium conjunctivum and  
595 related structures. *J Comp Neurol* 102, 151-322.
- 596 Chiken, S., and Nambu, A. (2016). Mechanism of Deep Brain Stimulation: Inhibition,  
597 Excitation, or Disruption? *The Neuroscientist* 22, 10.
- 598 Cohen-Kashi Malina, K., Mohar, B., Rappaport, A.N., and Lampl, I. (2016). Local and  
599 thalamic origins of correlated ongoing and sensory-evoked cortical activities. *Nat Commun* 7,  
600 12740.
- 601 Cohen, O., Harel, R., Aumann, T.D., Israel, Z., and Prut, Y. (2017). Parallel processing of  
602 internal and external feedback in the spinocerebellar system of primates. *Journal of*  
603 *neurophysiology* 118, 254-266.
- 604 Crammond, D.J., and Kalaska, J.E. (1996). Differential relation of discharge in primary motor  
605 cortex and premotor cortex to movements versus actively maintained postures during a  
606 reaching task. *Experimental brain research* 108, 45-61.
- 607 Deuschl, G., Wenzelburger, R., Löffler, K., Raethjen, J., and Stolze, H. (2000). Essential  
608 tremor and cerebellar dysfunction: clinical and kinematic analysis of intention tremor. *Brain :  
609 a journal of neurology* 123, 1568-1580.
- 610 Diener, H.C., and Dichgans, J. (1992). Pathophysiology of cerebellar ataxia. *Movement*  
611 *Disorders* 7, 95-109.
- 612 Dostrovsky, J.O., and Lozano, A.M. (2002). Mechanisms of deep brain stimulation.  
613 *Movement Disorders* 17, S63-S68.
- 614 Fenoy, J., and Schiess, M.C. (2017). Deep Brain Stimulation of the Dentato-Rubro-Thalamic  
615 Tract: Outcomes of Direct Targeting for Tremor. *Neuromodulation* 20, 429-436.
- 616 Flament, D., and Hore, J. (1986). Movement and electromyographic disorders associated  
617 with cerebellar dysmetria. *Journal of neurophysiology* 55, 1221-1233.
- 618 Garwicz, M. (2002). Spinal reflexes provide motor error signals to cerebellar modules—  
619 relevance for motor coordination. *Brain Research Reviews* 40, 152-165.
- 620 Goodkin, H., Keating, J., Martin, T., and Thach, W. (1993). Preserved simple and impaired  
621 compound movement after infarction in the territory of the superior cerebellar artery. *Can J*  
622 *Neurol Sci* 20, s93-s104.
- 623 Gornati, S.V., Schafer, C.B., Rooda, O.H.J.E., Nigg, A.L., Zeeuw, C.I.D., and Hoebeek, F.E.  
624 (2018). Differentiating Cerebellar Impact on Thalamic Nuclei. *cell reports* 23, 2690-2704.
- 625 Hodaie, M., Wennberg, R.A., Dostrovsky, J.O., and Lozano, A.M. (2002). Chronic Anterior  
626 Thalamus Stimulation for Intractable Epilepsy. *Epilepsia* 43, 603-608.
- 627 Holmes, G. (1917). The symptoms of acute cerebellar injuries due to gunshot injuries. *Brain :  
628 a journal of neurology* 40, 361-535.
- 629 Holmes, G. (1939). The Cerebellum of man. *Brain : a journal of neurology* 62.
- 630 Hore, J., and Flament, D. (1988). Changes in motor cortex neural discharge associated with  
631 the development of cerebellar limb ataxia. *Journal of neurophysiology* 60, 1285-1302.

- 632 Hore, J., Wild, B., and Diener, H.C. (1991). Cerebellar dysmetria at the elbow, wrist, and  
633 fingers. *Journal of neurophysiology* 65, 9.
- 634 Horne, M., and Butler, E. (1995). The role of the cerebello-thalamo-cortical pathway in skilled  
635 movement. *Prog Neurobiol* 46, 199-213.
- 636 Huisman, A.M., Kuypers, H.G.J.M., Conde´, F., and Keizer, K. (1983). Collaterals of  
637 rubrospinal neurons to the cerebellum in rat. A retrograde fluorescent double labeling study.  
638 *Brain research* 264, 181-196.
- 639 Iremonger, K.J., Anderson, T.R., Hu, B., and Kiss, Z.H. (2006). Cellular mechanisms  
640 preventing sustained activation of cortex during subcortical high-frequency stimulation.  
641 *Journal of neurophysiology* 96, 613-621.
- 642 Ivanusic, J.J., Bourke, D.W., Xu, Z.M., Butler, E.G., and Horne, M.K. (2005). Cerebellar  
643 thalamic activity in the macaque monkey encodes the duration but not the force or velocity of  
644 wrist movement. *Brain research* 1041, 181-197.
- 645 Jackson, A., Gee, V., Baker, S., and Lemon, R. (2003). Synchrony between Neurons with  
646 Similar Muscle Fields in Monkey Motor Cortex. *Neuron* 38, 115-125.
- 647 Jones, E.G. (1983). Lack of collateral thalamocortical projections to fields of the first somatic  
648 sensory cortex in monkeys. *exp Brain Res* 52, 375-384.
- 649 Kaufman, M., Churchland, M., Ryu, S., and Shenoy, K. (2014). Cortical activity in the null  
650 space: permitting preparation without movement. *Nature neuroscience* 17, 440–448.
- 651 Lee, D., Port, N., Kruse, W., and Georgopoulos, A. (1998). Variability and correlated noise in  
652 the discharge of neurons in motor and parietal areas of the primate cortex. *The Journal of  
653 neuroscience : the official journal of the Society for Neuroscience* 18, 1161-1170.
- 654 Limousin, P., Krack, P., Pollak, P., Benazzouz, A., Ardouin, C., Hoffmann, D., and Benabid,  
655 A.-L. (1998). Electrical stimulation of the subthalamic nucleus in advanced Parkinson's  
656 disease. *NEJM* 339, 1105-1111.
- 657 Machado, A.S., Darmohray, D.M., Fayad, J., Marques, H.G., and Carey, M.R. (2015). A  
658 quantitative framework for whole-body coordination reveals specific deficits in freely walking  
659 ataxic mice. *eLife*.
- 660 Martin, J.H., Cooper, S.E., Hacking, A., and Ghez, C. (2000). Differential Effects of Deep  
661 Cerebellar Nuclei Inactivation on Reaching and Adaptive Control. *Journal of neurophysiology*  
662 83, 1886-1899.
- 663 Mazurek, K.A., and Schieber, M.H. (2017). Injecting Instructions into Premotor Cortex.  
664 *Neuron* 96, 1282-1289.
- 665 Meyer-Lohmann, J., Conrad, B., Matsunami, K., and Brooks, V.B. (1975). Effects of dentate  
666 cooling on precentral unit activity following torque pulse injections into elbow movements.  
667 *Brain research* 94, 237-251.
- 668 Meyer-Lohmann, J., Hore, J., and Brooks, V. (1977). Cerebellar participation in generation of  
669 prompt arm movements. *Journal of neurophysiology* 40, 1038-1050.
- 670 Murphy, J.T., Wong, Y.C., and Kwan, H.C. (1985). Sequential activation of neurons in  
671 primate motor cortex during unrestrained forelimb movement. *J Neurophysiol* 53, 435-445.
- 672 Nashef, A., Cohen, O., Israel, Z., Harel, R., and Prut, Y. (2018). Cerebellar shaping of motor  
673 cortical firing is correlated with timing of motor actions. *Cell reports* 23, 1275–1285.

- 674 Nathan, P., and Smith, M. (1982). The rubrospinal and central tegmental tracts in man.  
675 *Brain: a journal of Neurology* 105, 223-269.
- 676 Nioche, C., Cabanis, E.A., and Habas, C. (2009). Functional Connectivity of the Human Red  
677 Nucleus in the Brain Resting State at 3T. *American Journal of Neuroradiology* 30, 396-403.
- 678 Padel, Y., Angaut, P., Massion, J., and Sedan, R. (1981). Comparative Study of the  
679 Posterior Red Nucleus in Baboons and Gibbons. *the journal of comparative neurology* 202,  
680 421-438.
- 681 Percheron, G., Francois, C., Talbi, B., Yelnik, J., and Fenelon, G. (1996). The primate motor  
682 thalamus. *Brain Res Brain Res Rev* 22, 93-181.
- 683 Proville, R.D., Spolidoro, M., Guyon, N., Dugue, G.P., Selimi, F., Isope, P., Popa, D., and  
684 Lena, C. (2014). Cerebellum involvement in cortical sensorimotor circuits for the control of  
685 voluntary movements. *Nature neuroscience* 17, 1233-1239.
- 686 Riehle, A., Wirtsohn, S., Grun, S., and Brochier, T. (2013). Mapping the spatio-temporal  
687 structure of motor cortical LFP and spiking activities during reach-to-grasp movements.  
688 *Frontiers in neural circuits* 7, 48.
- 689 Rispal-Padel, L., Cicirata, F., and Pons, C. (1981). Contribution of the dentato-thalamo-  
690 cortical system to control of motor synergy. *Neurosci Lett* 22, 137-144.
- 691 Ruach, R., Mitelman, R., Sherman, E., Cohen, O., and Prut, Y. (2015). An assumption-free  
692 quantification of neural responses to electrical stimulations. *J Neurosci Methods*.
- 693 Rubino, D., Robbins, K.A., and Hatsopoulos, N.G. (2006). Propagating waves mediate  
694 information transfer in the motor cortex. *Nat Neurosci* 9, 1549-1557.
- 695 Sakai, S.T., Insaie, M., and Tanji, J. (1996). Comparison of cerebellothalamic and  
696 pallidothalamic projections in the monkey (*Macaca fuscata*)- a double anterograde labeling  
697 study. *the journal of comparative neurology* 368, 215-228.
- 698 Schlerf, J.E., Spencer, R.M., Zelaznik, H.N., and Ivry, R.B. (2007). Timing of rhythmic  
699 movements in patients with cerebellar degeneration. *Cerebellum* 6, 221-231.
- 700 Schoen, J. (1964). Comparative Aspects of the Descending Fibre Systems in the Spinal  
701 Cord. *Progress in Brain Research* 11, 203-222.
- 702 Scott, S.H. (1999). Apparatus for measuring and perturbing shoulder and elbow joint  
703 positions and torques during reaching. *j Neurosci Meth* 89, 119-127.
- 704 Shalit, U., Zinger, N., Joshua, M., and Prut, Y. (2012). Descending systems translate  
705 transient cortical commands into a sustained muscle activation signal. *Cereb Cortex* 22,  
706 1904-1914.
- 707 Shinoda, Y., Kakei, S., Futami, T., and Wannier, T. (1993). Thalamocortical organization in  
708 the cerebello-thalamo-cortical system. *Cereb Cortex* 3, 421-429.
- 709 Shinoda, Y., Yamazaki, M., and Futami, T. (1982). Convergent inputs from the dentate and  
710 the interpositus nuclei to pyramidal tract neurons in the motor cortex. *Neurosci Lett* 34, 111-  
711 115.
- 712 Spencer, R.M., Zelaznik, H.N., Diedrichsen, J., and Ivry, R.B. (2003). Disrupted timing of  
713 discontinuous but not continuous movements by cerebellar lesions. *Science* 300, 1437-  
714 1439.

- 715 ten Donkelaar , H.J. (1988). Evolution of the red nucleus and rubrospinal tract Behavioural  
716 Brain Research 28, 9-20.
- 717 Thach, W., Perry, J., Kane, S., and Goodkin, H. (1993). Cerebellar nuclei: rapid alternating  
718 movement, motor somatotopy, and a mechanism for the control of muscle synergy. Rev  
719 Neurol (Paris) 149, 607-628.
- 720 Thach, W.T., Goodkin, H.P., and Keating, J.G. (1992). The cerebellum and the adaptive  
721 coordination of movement. Annual review of neuroscience 15, 403-442.
- 722 Torres, C.V., Moro, E., Lopez-Rios, A.-L., Hodaie, M., Chen, R., Laxton, A.W., Hutchison,  
723 W.D., Dostrovsky, J.O., and Lozano, A.M. (2010). Deep Brain Stimulation of the Ventral  
724 Intermediate Nucleus of the Thalamus for Tremor in Patients With Multiple Sclerosis.  
725 Neurosurgery 67, 646-651.
- 726 Tsujimoto, T., H.Gemba, and Sasaki, K. (1993). Effect of cooling the dentate nucleus of the  
727 cerebellum on hand movement of the monkey. Brain research 629, 1-9.
- 728 Vaadia, E., Haalman, I., Abeles, M., Bergman, H., Prut, Y., Slovin, H., and Aertsen, A.  
729 (1995). Dynamics of neuronal interactions in monkey cortex in relation to behavioural events.  
730 Nature 373, 515-518.
- 731 Wang, L.-Y., and Kaczmarek, L.K. (1998). High-frequency firing helps replenish the readily  
732 releasable pool of synaptic vesicles. Nature 394, 384-388.
- 733 Wiesendanger, R., and Wiesendanger, M. (1985). The thalamic connections with medial  
734 area 6 (supplementary motor cortex) in the monkey (macaca fascicularis). Experimental  
735 brain research 59, 91-104.
- 736 Yanai, Y., Adami, N., Harel, R., Israel, Z., and Prut, Y. (2007). Connected corticospinal sites  
737 show enhanced tuning similarity at the onset of voluntary action. The Journal of  
738 neuroscience : the official journal of the Society for Neuroscience 27, 12349-12357.
- 739 Zucker, R., and Regehr, W. (2002). Short-term synaptic plasticity. Annu Rev Physiol 64,  
740 355-405.
- 741
- 742
- 743
- 744
- 745
- 746
- 747
- 748
- 749

750 **FIGURES**

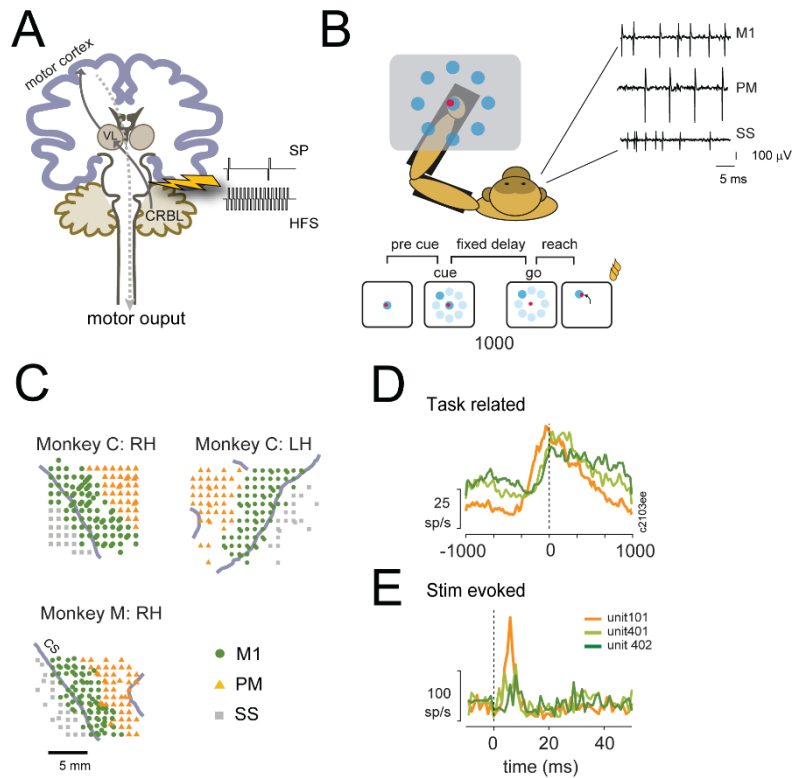

751

752 **Figure 1. Experimental design and recording configuration**

753 **(A)** A schematic view of the CTC system. The system originates from cells in the  
 754 deep cerebellar nuclei (primarily the dentate nucleus). Axons of these cells make  
 755 initial synaptic contact in the motor thalamus, mainly the ventrolateral nuclei (VL).  
 756 Thalamocortical fibers make a second synaptic contact in the motor cortex. Motor  
 757 cortical output projects downstream to primarily affect the contralateral part of the  
 758 body (ipsilateral to the cerebellar projection site). Neural activity was recorded from  
 759 the motor and somatosensory areas of the cortex while stimulations were applied to  
 760 the superior cerebellar peduncle (SCP) according to one of two stimulation protocols:  
 761 single pulse (SP) bipolar stimulation applied at low frequency or high frequency  
 762 stimulation (HFS). CRBL- cerebellum. **(B)** Behavioral paradigm. Monkeys were  
 763 trained to wear an exoskeleton and control a cursor that appeared on a horizontally  
 764 positioned screen. The movement of the monkeys was constrained to planar,  
 765 shoulder-elbow reaching movements. The sequence of events composing a single  
 766 trial included a pre-cue period, target onset (where 1 of 8 equally distributed targets  
 767 appeared), a delay period and a “go” signal, after which the monkey had to acquire  
 768 the target within a pre-defined movement time. Correct performance resulted in a  
 769 reward (a drop of applesauce). Neural activity was recorded simultaneously from the  
 770 motor and sensorimotor cortical areas. M1- primary motor; PM- premotor; SS-  
 771 somatosensory. Vertical scale bar: 100  $\mu$ V; Horizontal scale bar: 5 ms **(C)** Cortical  
 772 maps obtained from monkey C (right and left hemispheres: RH, LH) and monkey M  
 773 (right hemisphere only). CS- central sulcus. Scale bar- 5 mm **(D)** Peri-event time

774 histogram calculated for three, simultaneously recorded cortical neurons around  
775 movement onset ( $t=0$ ). Two neurons were recorded from M1 (green curves) and one  
776 from the PM cortex. (E) Evoked response of the three neurons shown in (D) to single  
777 pulse SCP stimulation.

778



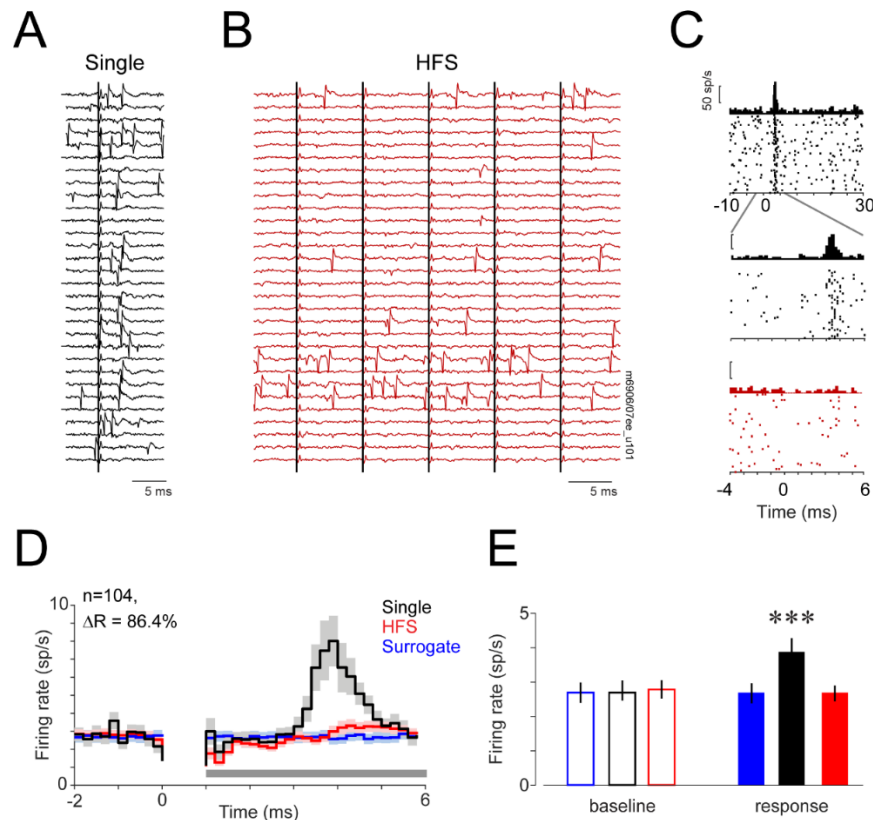

779

780 **Figure 2. Neural response to SCP stimulation was abolished at high**  
781 **frequencies**

782 (A) Example of a single neuron response to SCP stimulation applied at low  
783 frequency (single-pulse stimuli). The figure shows 30 randomly selected stimulation  
784 sweeps. The single sweep response of the cell is variable but clearly observable.  
785 Scale bar: 5 ms (B) Activity of the same cortical cell during stimulation applied at the  
786 same intensity as in (A) but at high frequency (HFS). Each trace captures 5  
787 successive stimuli. In this case, successive traces were obtained at regular intervals  
788 along the entire HFS epoch. Upper traces present early occurring stimuli during the  
789 HFS, whereas bottom traces are from late parts of the HFS. Scale bar: 5 ms. (C)  
790 Raster plots and PSTHs of the single cell response to SCP stimulation. Same  
791 neuron as shown in (A) and (B). Top plot, response of cells to single pulse  
792 stimulation. Middle plot shows the same single-pulse response but at an extended  
793 time scale. Bottom plot presents the response of the same neuron to stimulation  
794 applied at high frequency. Scale bars: 50 sp/s. (D) Average cortical response  
795 computed by averaging the single cell response (quantified by the average firing rate  
796 around stimulus onset time) across all responsive cortical neurons (n=104) for single  
797 pulse stimulation (single, black), high-frequency stimulation (HFS, red) and control  
798 (surrogate, blue). Single cell responses were computed using a 0.2 ms bin size. The  
799 gap after time zero reflects the stimulus-related dead-time in spike detection.  
800 Shading around each response curve depicts the standard error of the mean (E)  
801 Comparisons of post-stimulus firing rate, computed between 1 and 6 ms after  
802 stimulus onset to pre-stimulation baseline (defined between -2 to 0 ms) for the three  
803 protocols (surrogate control, single pulse and HFS). For each epoch we compared  
804 the post-stimulation rate (full bars) to the pre-stimulation baseline level (empty bars)  
805 using Wilcoxon's signed-rank (\*\*\*,  $p < 0.001$ ). **See also Fig. S1.**



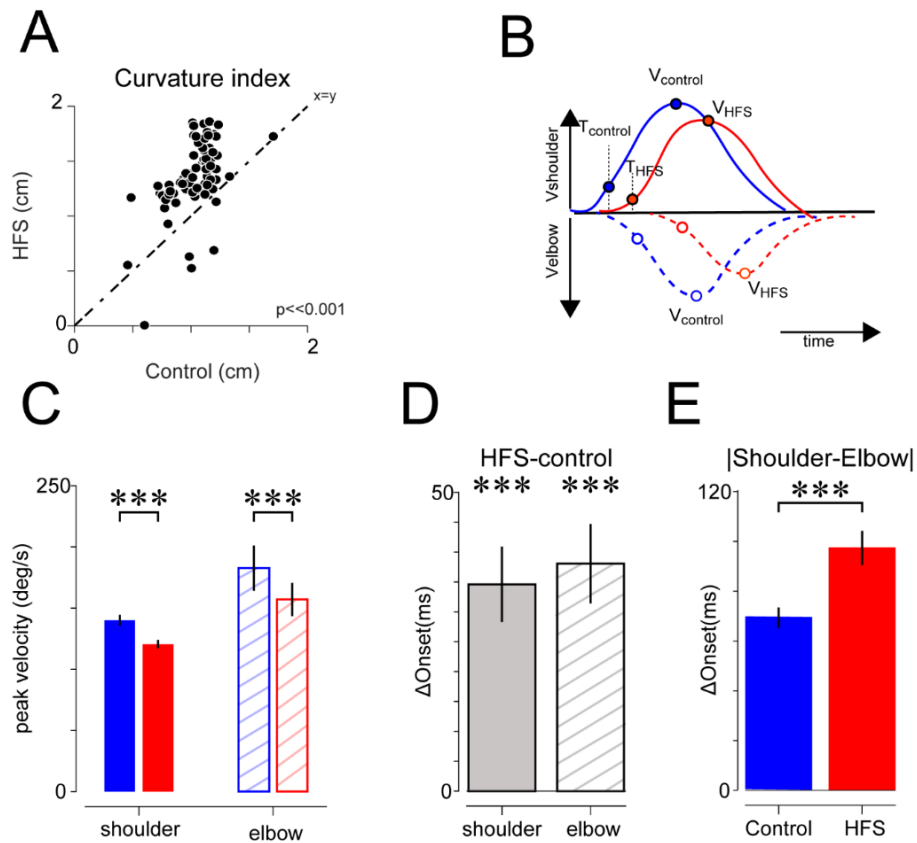

824

825 **Figure 4. HFS impaired inter-joint coordination**

826 (A) Relations between the curvature index (see Methods) computed during control  
 827 and HFS calculated during movement time (paired t-test,  $p < 10^{-8}$ ;  $n = 77$  recording  
 828 sessions). (B) Schematic illustration of a shoulder (solid line) and elbow (dashed)  
 829 angular velocity profile recorded during control (blue) and HFS (red) trials for a  
 830 movement to a specific target. Using the velocity profile we calculated the maximal  
 831 velocity ( $V_{\text{control}}$ ,  $V_{\text{HFS}}$ ) and movement onset time ( $T_{\text{control}}$ ,  $T_{\text{HFS}}$ ) defined as the time  
 832 when velocity exceeded a threshold value of  $0.5 \times$  baseline noise for a consistent  
 833 time period (see Methods). (C) Peak angular velocity for shoulder (solid bars) and  
 834 elbow (hatched bars) joints during control (blue) and HFS (red) trials (paired t-test,  
 835  $p < 0.001$  for both joints). (D) Mean change in onset time for shoulder (solid) and  
 836 elbow (hatched) joints during HFS application relative to onset time computed during  
 837 control trials (paired t-test,  $p < 0.001$ ). (E) Mean changes in the shoulder to elbow  
 838 onset latency following HFS application (paired t-test;  $p < 0.001$ ). All values were  
 839 computed relative to the “GO” signal. **See also Fig. S2.**

840

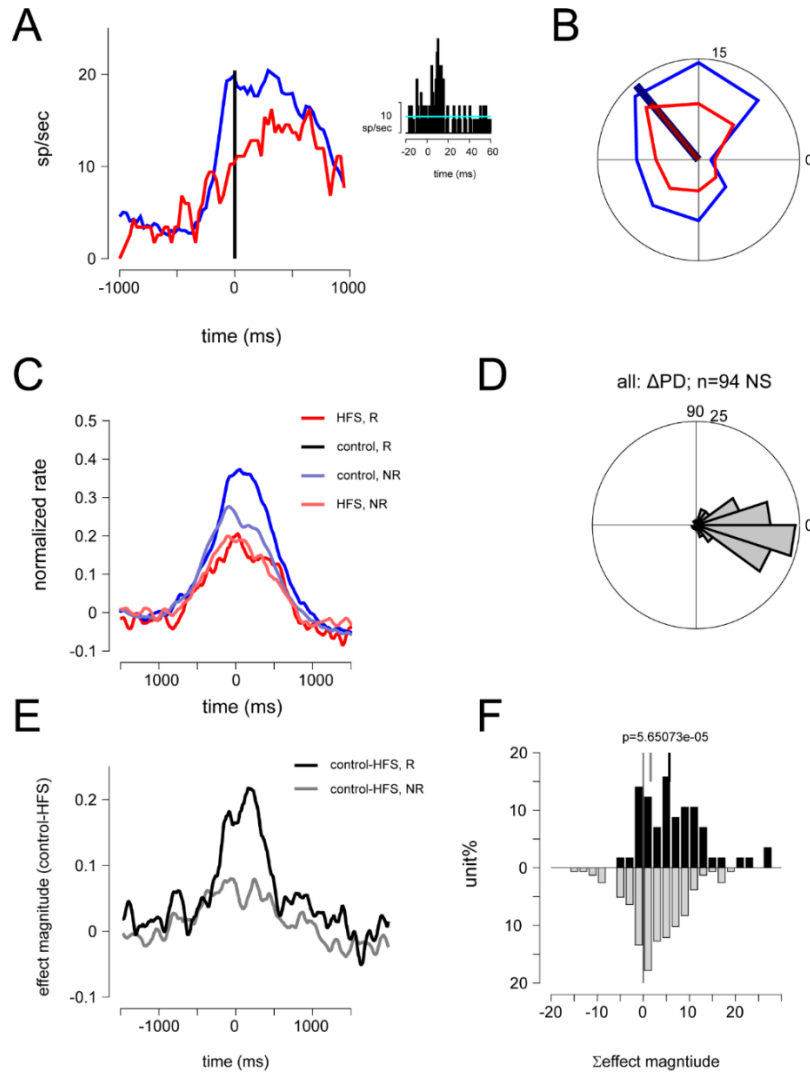

841

842 **Figure 5. Task-related activity of cortical neurons was attenuated during HFS**  
 843 (A) Example of task-related activity of an SCP-responsive neuron during control  
 844 trials (blue) and HFS (red) trials around movement onset. Inset shows the response  
 845 of the unit to single pulse SCP stimulation. (B) Tuning curve computed for the same  
 846 neurons in (A) during control and HFS trials. The preferred direction of the cell is  
 847 shown for both cases. (C) The mean normalized rate during control and HFS trials  
 848 computed for responsive (R, n=57) or non-responsive (NR, n=158) neurons around  
 849 movement onset. (D) Distribution of single-cell change in preferred direction between  
 850 HFS and control trials ( $\Delta$ PD) is shown for all cells that were tuned in both conditions.  
 851 The mean value of the distribution was not significantly different from zero (one  
 852 sample t-test for circular data with mean angle:  $p=0.59$ ). The same results were  
 853 obtained when considering only SCP responsive neurons (n=18,  $p=0.65$  for  
 854 responsive units). (E) Mean change in response profile computed by subtracting the  
 855 single cell response obtained for HFS trials from the corresponding response for  
 856 control trials and averaging the resulting function across all responsive (black) and  
 857 non-responsive (gray) neurons. (F) For each neuron we quantified the change in  
 858 response computed during HFS and control trials by integrating the normalized rate

859 change over a time window spanning 50 to 350 ms around movement onset. The  
860 figure shows the distribution of these values computed for responsive (black) and  
861 non-responsive (gray) cortical neurons. The mean value of the two histograms are  
862 indicated by the vertical lines. The difference between these averages was  
863 significantly different (average accumulated change in responsiveness=  $5.7 \pm 0.94$   
864 spikes, non-responsive=  $1.61 \pm 0.49$  spikes, two-way t-test,  $p < 0.001$ ). **See also Fig.**  
865 **S3 and S4.**

866

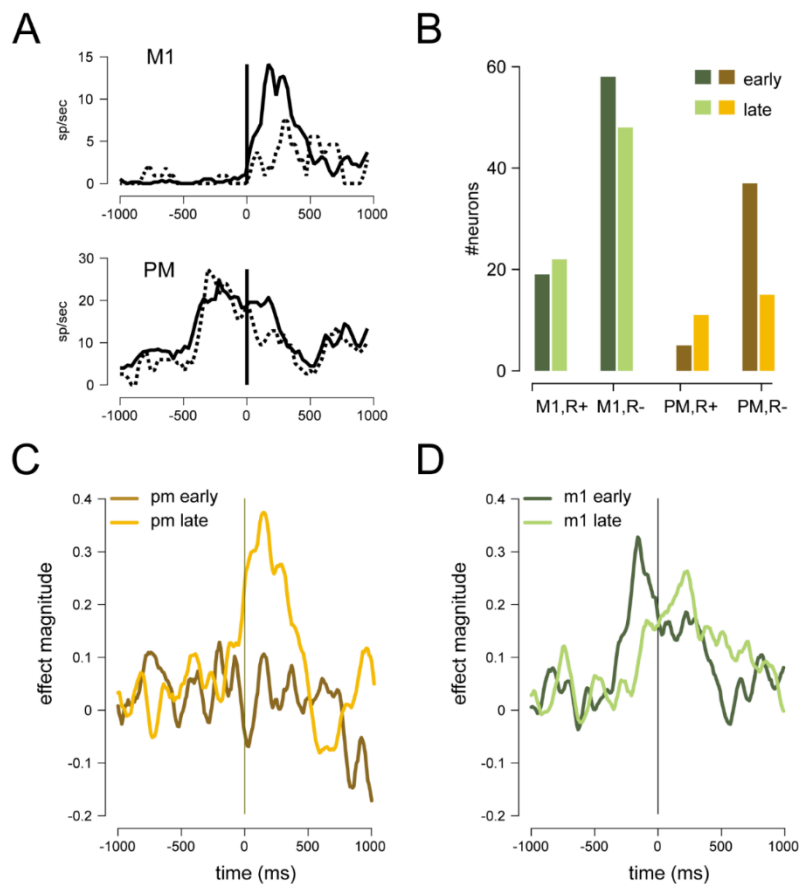

867

868 **Figure 6. Differential effect of HFS on early and late motor cortical activity**

869 (A) Example of a single cell response computed for an M1 neuron (upper panel) with  
870 a late peak response and a PM neuron (lower panel) with an early peak response.  
871 For both cells we show the average response during control (solid) and HFS  
872 (dashed) trials. Response peak time (early or late) was defined based on peak-time  
873 relative to movement onset during control trials. (B) Number of responsive (R+) and  
874 non-responsive (R-) neurons in M1 and PM areas segregated by response peak time  
875 (early – dark hues, late - light hues). For PM neurons, there were fewer early  
876 responsive neurons (n=5) than late responsive cells (n=11), whereas the reverse  
877 was true for non-responsive cells (early, n=37; late, n=15). These differences were  
878 significant ( $p < 0.02$ ,  $X^2$  test). For M1 neurons there were no significant differences in  
879 early vs. late cells for responsive and non-responsive neurons (responsive: early=19,  
880 late=22; non-responsive: early= 58, late=48). (C) The single cell changes in response  
881 profile during HFS compared to control trials was computed, normalized and  
882 averaged separately for early and late PM neurons that responded to SCP  
883 stimulation. (D) same as (C) but for M1 neurons.

884

885

886

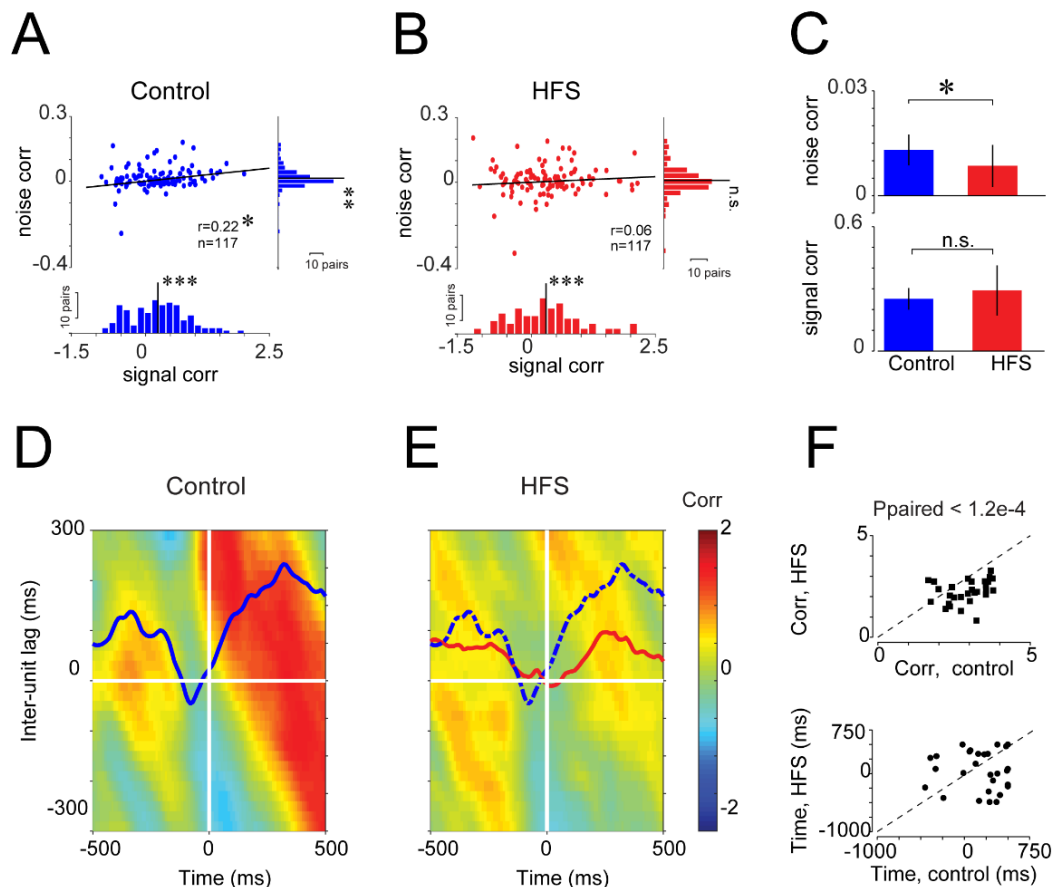

887

888 **Figure 7. Reduced motor cortical synchrony during HFS**

889 (A) Relation between noise and signal correlation for pairs of cortical neurons  
 890 recorded from the same electrode ( $n=117$  pairs) during control trials. The marginal  
 891 distribution of each parameter and its deviation from zero are captured by the two  
 892 histograms ( $P_{\text{noise}} < 0.005$ ,  $P_{\text{signal}} < p < 10^{-5}$  one-sample t-test). The correlation  
 893 between noise and signal was tested as well ( $r=0.22$ ,  $p < 0.05$ ). (B) Same as (A) but  
 894 for correlation values computed during HFS trials. For the marginal distribution,  $P_{\text{noise}}$   
 895  $< 0.15$  and  $P_{\text{signal}} < 10^{-5}$ . The noise-signal correlation was  $r=0.06$  (n.s.). Scale bars:  
 896 10 pairs. (C) The average noise (top) and signal (bottom) correlation during control  
 897 and HFS trials (Kolmogorov-Smirnov test,  $p < 0.05$  for noise and n.s. for signal  
 898 correlation). (D) Mean response correlation between pairs of neurons recorded  
 899 simultaneously from shoulder-related and elbow-related cortical sites during control  
 900 trials. The aligning event was the peak time of shoulder-related activity computed  
 901 separately for each pair of neurons. Response correlation was measured for each  
 902 time along the trial (x-axis) and inter-neuron time lag (y-axis). To average across all  
 903 pairs, correlation matrices were transformed into Z-values. Bold line over the matrix  
 904 represents the average correlation value computed for zero (inter-unit) lag. (E) Same  
 905 as (D) but correlations computed during HFS trials. Here, the red curve depicts the  
 906 mean correlation for the zero (inter-unit) lag during HFS trials, and the blue dashed  
 907 curve is taken from panel (D) and is shown here for comparison. (F) Top: Pairwise  
 908 comparison between peak correlation values for the time-resolved correlation during

909 control (x-axis) and HFS (y-axis) trials. Peak values were computed for each pair of  
910 neurons using the time resolved correlation at zero inter-unit lag time (similar to the  
911 curves highlighted in panels (D,E)). Correlation values on control and HFS trials  
912 were slightly dependent (Spearman correlation coefficient = 0.38,  $p < 0.036$ ) but  
913 significantly lower during HFS compared to control trials ( $p < 0.00012$ , Wilcoxon  
914 signed-rank). Bottom: Same but for peak correlation time. There was no significant  
915 correlation between peak times in the control and HFS. **See also Fig. S5-7.**

916



917 **STAR★Methods**

918

919 **RESOURCE TABLE**

| Reagent or Resource                   | Source                 | Identifier                                                            |
|---------------------------------------|------------------------|-----------------------------------------------------------------------|
| Experimental model: Organisms/strains |                        |                                                                       |
| <i>Macaca fascicularis</i>            | The Hebrew University  | N/A                                                                   |
| Software and Algorithms               |                        |                                                                       |
| MATLAB 2016b                          | Mathworks              | <a href="https://www.mathworks.com/">https://www.mathworks.com/</a>   |
| Other                                 |                        |                                                                       |
| NSEX-100                              | David Kopf instruments | <a href="http://kopfinstruments.com/">http://kopfinstruments.com/</a> |

920

921

922 **CONTACT FOR RESOURCE SHARING**

923 Further information and requests for resources and reagents should be directed to  
924 and will be fulfilled by the lead contact, Yifat Prut ([yifatpr@ekmd.huji.ac.il](mailto:yifatpr@ekmd.huji.ac.il)).

925

926 **EXPERIMENTAL MODEL AND SUBJECT DETAILS**

927 This study was performed on two adult female monkeys (*Macaca fascicularis*, weight  
928 4.5- 8 kg). The care and surgical procedures of the subjects were in accordance with  
929 the Hebrew University Guidelines for the Use and Care of Laboratory Animals in  
930 Research, supervised by the Institutional Committee for Animal Care and Use.

931

932

933

934

## 935 **METHOD DETAILS**

### 936 **Behavioral task and electrophysiological recordings**

937 Data were obtained from two *Macaca fascicularis* monkeys (females, 4.5-8 Kg). The  
938 monkeys' care and surgical procedures were in accordance with the Hebrew  
939 University Guidelines for the Use and Care of Laboratory Animals in Research,  
940 supervised by the Institutional Committee for Animal Care and Use. The two  
941 monkeys were trained to sit in a primate chair, wear an exoskeleton (KINARM, BKIN  
942 technologies) and perform a planar, shoulder-elbow reaching task. In this task, the  
943 monkeys were instructed to locate a cursor within a central target. After 500 ms, a  
944 peripheral target (one of 8 evenly distributed targets) appeared and the monkey had  
945 to wait until the central target disappeared ("GO" signal) and reach the cued  
946 peripheral targets. If the monkey moved the cursor to the correct target within the  
947 predefined time limits it was rewarded with a drop of applesauce. To encourage the  
948 monkey to predict the timing of the "go" signal, we limited the total time it had to  
949 reach the peripheral target to 500 ms and inserted a 200 ms grace period before the  
950 GO signal. Onset of movement within this time frame did not abort the trial (**Fig. 1B**).

951 After training was completed, a recording chamber (21x21 mm or 27x27 mm) was  
952 attached to the monkeys' skull above the hand-related area of the motor cortex in a  
953 surgical procedure under general anesthesia. After a recovery and re-training period,  
954 we recorded motor cortical activity extracellularly. During recording sessions, glass  
955 coated tungsten electrodes (impedance 300-800 k $\Omega$  at 1,000 Hz) were inserted  
956 through the chamber to different cortical sites, mostly in the primary motor cortex  
957 (M1). The signal obtained from each electrode was amplified ( $\times 10^4$ ), and bandpass-  
958 filtered online (300-6,000 Hz). The signal was then digitized (24 kHz) and saved to  
959 disk.

### 960 **Insertion of stimulating electrode into the superior cerebellar peduncle (SCP).**

961 To insert a chronic stimulating electrode into the ipsilateral SCP, we implanted a  
962 small chamber above the estimated insertion point and used a post-surgery MRI to  
963 plan the electrode trajectory. A bi-polar concentric electrode (NSEX100, David Kopf  
964 Instruments, impedance range of 30-60 k $\Omega$ ) and the evoked intra-cortical responses  
965 to stimulation through the electrode were used to verify its location (Nashef et al.,  
966 2018; Ruach et al., 2015).

967 **Mapping cortical areas.**

968 We used a set of up to 4 movable glass-coated tungsten electrodes (impedance  
969 300-800 k $\Omega$  at 1 kHz) to record from motor and somatosensory areas of the cortex.  
970 For each recording site we mapped the motor response by observing the motor  
971 response evoked by intra-cortical microstimulation (train of stimuli applied at 333 Hz  
972 for 50 ms at intensities  $\leq 60\mu\text{A}$ ). A site for which an observable motor response was  
973 obtained at a threshold level  $\leq 15\mu\text{A}$  was defined as the primary motor cortex (M1). A  
974 site that evoked a motor response at higher amplitudes and was located more than  
975 3mm anterior to the central sulcus was defined as premotor (PM). Stimulation in  
976 somatosensory sites were located caudal to the CS and either required high stimulus  
977 intensities to produce a motor response or, more often, did not produce any motor  
978 response. Figure 1C presents the recording maps obtained for the two monkeys (2  
979 hemispheres for monkey C and 1 for monkey M).

980 **SCP stimulation protocol.**

981 To stimulate the SCP we used the following protocols.

982 *Single pulse stimulation.* Single stimulation pulses were applied via the SCP  
983 electrode while the monkey performed the task and neuronal activity was recorded.  
984 Each stimulation pulse was biphasic (200  $\mu\text{s}$  each phase). A single set of stimuli  
985 consisted of about 200 stimuli that were delivered at 3 Hz and a fixed intensity  
986 (ranging from 50 to 300  $\mu\text{A}$ ).

987 *High frequency stimulation (HFS).* We applied a long train of stimuli at high  
988 frequency through the SCP electrode during task performance and while recording  
989 cortical activity. HFS consisted of biphasic single pulse stimuli that were applied at  
990 130 Hz and for a period of 120-180 seconds. Each train was delivered at a fixed  
991 intensity of 50-150  $\mu\text{A}$ .

992 Each recording session (from a specific recording site) was usually tested in the  
993 following manner: (1) a set of control trials (about 80 trials); (2) 2-3 sets of single  
994 pulse stimulation applied at different intensities were applied; (3) pre-HFS control  
995 trials (~50 trials); (4) HFS trials lasting 120-180 seconds; (5) "washout" trials (with no  
996 stimulation). During this time the monkeys performed the task and neural activity was  
997 recorded.

998

999

1000 **EMG data.**

1001 Muscle activity (EMG) was recorded from the two monkeys using transcutaneous  
1002 electrodes inserted into selected arm and forearm muscles. The signals were filtered  
1003 between 30 and 3,000 Hz and were digitized at 16 KHz per channel. EMG was  
1004 recorded from the extensor-carpi-ulnaris, extensor-digitorum-carpi, extensor-carpi-  
1005 radialis, flexor carpi ulnaris, palmaris longus, flexor carpi radialis, flexor digitorum  
1006 superficialis, flexor digitorum profundus, extensor digitorum 2,3, abductor pollicis  
1007 longus, brachioradialis, biceps, triceps, deltoid, and pectoralis major.

1008 **QUANTIFICATION AND STATISTICAL ANALYSIS**

1009 All data were analyzed using MATLAB software (Mathworks).

1010 **Movement kinematics.**

1011 During task performance we continuously measured the angular velocities of the  
1012 shoulder and elbow joint and the endpoint position of the working arm. We used  
1013 these measures to compute the following parameters:

- 1014 1. Response time and movement time. Response time was calculated as the time  
1015 between the appearance of the GO signal (the central target disappeared) and  
1016 movement onset time. Since the monkey was allowed to move before the GO  
1017 signal the response time was often negative, indicating a predictive timing control  
1018 of the monkey. Movement time was defined as the time from movement onset  
1019 until target acquisition (time in which the cursor entered the peripheral target).
- 1020 2. Peak velocity. Maximal angular velocity (specified in degrees/second) of the  
1021 working joints was calculated in a time window spanning -2 to 2 seconds around  
1022 the GO signal.
- 1023 3. Onset time of joint movements. The onset time of movement was defined  
1024 separately for the shoulder and elbow joints in the following manner: for each  
1025 trial, the single-joint radial velocity was first smoothed using a moving average  
1026 spanning 10 bins. The baseline level and baseline noise (i.e., standard deviation  
1027 around the mean – STD) of the joint velocity were calculated for a time window  
1028 spanning -750 to -500 ms before the GO signal, when no movement occurred.  
1029 We then focused on a time window starting at -250 before the GO signal, and  
1030 searched for the time when the velocity signal deviated from the baseline level,

1031 and crossed a threshold of  $\pm 20xSTD$  and remained above or below this  
1032 threshold level for at least 200 ms. From this starting point, we went back to find  
1033 the point where the velocity level crossed the baseline threshold  $\pm 0.5xSTD$ . This  
1034 point was defined as the onset time of joint movement.

1035 4. Movement curvature. We calculated the average distance of the actual enacted  
1036 trajectory from a direct line connecting the start and end points of the trajectory.  
1037 This parameter was previously defined as the *curvature index* (Deuschl et al.,  
1038 2000).

### 1039 **Analysis of Electrophysiological Data**

1040 Stimulus-evoked responses of single neurons. The first step in the offline processing  
1041 was to remove the stimulation artifacts from the neural signals by subtracting the  
1042 average profile of the stimulation artifact from the raw signal (Ruach et al., 2015).  
1043 Subsequently, an offline-sorting method (AlphaSort, Alpha-Omega, Nazareth, Israel)  
1044 was applied on the cleaned signal to extract spike times of single units. We then  
1045 calculated the SCP-evoked responses for each single unit by computing the peri-  
1046 stimulus time histogram (PSTH) in a time window of -50 to +100 ms around  
1047 stimulation time using a 1 ms bin size (Nashef et al., 2018). In short, background  
1048 firing was computed from -50 to -10 ms before stimulus onset. The post-stimulation  
1049 response was tested using two different time windows: strongly-locked early  
1050 responses within a window of 1 to 8 ms using 1 ms bins were identified by t-testing  
1051 the single trial spikes against the expected counts given the baseline rate level. A  
1052 second more global test was then carried out in which we again tested the post-  
1053 stimulus firing rate against background firing in a sliding window of 5 ms, shifted in 1  
1054 ms steps (1 bin). We used a t-test for the single sweep firing rates relative to the  
1055 background firing and identified significant responses, defined as those that deviated  
1056 from the background level with a probability of less than  $0.01/n$ , where  $n$  was the  
1057 number of bins (a Bonferroni correction to compensate for the fact that each bin was  
1058 tested several times). We identified excitatory and inhibitory responses in a time  
1059 frame of 2 to 45 ms by searching for at least 2 successive significant bins for  
1060 excitatory responses or 7 significant bins for inhibitory responses.

1061 Task-related response properties of recorded neurons. For each single unit, we  
1062 computed the tuning function and its preferred direction (PD). The preferred direction  
1063 was calculated individually for each isolated unit using a resampling method

1064 (Crammond and Kalaska, 1996; Shalit et al., 2012) (4,000 repetitions) during the -  
1065 500 to 500 ms around movement onset.

1066 Estimating firing rate during HFS. The persistent high frequency stimulation  
1067 produced many stimulus artifacts, some of which masked the action potentials  
1068 emitted by the recorded neurons because the recorded signal was often saturated  
1069 during part of the stimulus artifact. This random omission of spikes did not affect the  
1070 response pattern of the neuron but yielded a lower estimate of its firing rate. To  
1071 compensate for this loss of spikes when measuring the response pattern of each  
1072 neuron we first counted the number of stimuli that were applied in each time bin of  
1073 the peri-event time histogram (PETH) that was used to measure the neuronal  
1074 response pattern. Normally, the firing rate for each bin is computed as the total  
1075 number of spikes for that bin over the total time ( $N_{\text{spikes}}/T$  where  $T = \text{bin width} \times$   
1076 number of trials). During HFS trials, we subtracted the time loss due to the post-  
1077 stimulation dead time from  $T$ . This means that instead of  $T$  we used  $T - N_{\text{stim}} \times 0.5$   
1078 ms. The dead time was obtained by calculating the stimulus-triggered average of the  
1079 single cell activity during HFS, which was found to be consistent across cells.

1080 Measures of correlated firing between simultaneously recorded neurons. We used  
1081 two measures to quantify the correlation in firing between pairs of cortical neurons  
1082 that were recorded at the same time through the same or different electrodes.

1083 Signal correlation. For each neuron, we computed the target-related signal (i.e.,  
1084 tuning curve) around movement onset (-500 ms before movement onset to +500 ms  
1085 after). This tuning curve was simply the mean firing rate of the neuron while moving  
1086 toward each target across trial repetitions. For each pair of simultaneously recorded  
1087 neurons we computed the signal correlation by calculating the correlation coefficient  
1088 between their target-related signals (Lee et al., 1998).

1089 Noise correlation. For a single trial and a specific time window (-500 to +500 ms  
1090 around movement onset) we computed the instantaneous noise by subtracting the  
1091 average firing rate from the instantaneous firing rate, computed for trials with the  
1092 same target during that time window. The noise correlation was then calculated as  
1093 the correlation coefficient between the instantaneous noise of pairs of simultaneously  
1094 recorded neurons. For each pair of neurons, we only considered targets for which we  
1095 had at least 5 trials during the control and 2 during HFS. Furthermore, we only  
1096 considered pairs of cells for which we had data for at least 10 trials. All the signal

1097 and noise correlation values were z-transformed to normalize their distribution in the  
1098 following manner:  $z = 0.5 \times [\ln(1 + r) - \ln(1 - r)]$ .

1099 The correlation values obtained for HFS trials relied on a smaller number of trials  
1100 compared to the corresponding values obtained for the control trials. To compensate  
1101 for this difference, we used a bootstrap approach and randomly selected a subset of  
1102 control trials with a matching number of trials as obtained during HFS. The noise and  
1103 signal correlation for the control trials was computed for this random subset. This  
1104 procedure was repeated 1,000 times for each pair of neurons. The noise and signal  
1105 correlation for control trials was then taken as the mean of the distributions.

1106 *Time-resolved response correlation of neural pairs.* We examined the temporal  
1107 relations between response profiles of simultaneously recorded neurons. This was  
1108 done by first computing the PETH of the trigger neuron at its preferred direction ( $\pm 1$   
1109 target around the PD) around movement onset ( $\pm 2,000$  ms) and marking the time of  
1110 peak activity. We then computed the PETH of a reference neuron aligned on the  
1111 peak activity of the trigger neuron. The PETH was computed in a time window  
1112 spanning -500 to +500 ms around the aligning event and in the preferred target  $\pm 1$   
1113 target of the reference unit. To calculate the pairwise correlation matrix, we only  
1114 considered neurons that had a roughly similar preferred direction (i.e., up, down, left  
1115 or right). PETHs were computed using a 10 ms time bin.

1116 We computed the time-resolved response correlation between pairs of neurons  
1117 along trial time using a 200 ms time window shifted in 10 ms steps. For each point in  
1118 time, the response correlation was measured between the two corresponding PETH  
1119 vectors (each spanning 20 elements). We further computed correlation values after  
1120 shifting the inter-unit time lags (-200...+200 ms in 10 ms steps). This means that  
1121 each bin in the response correlation matrix corresponded to a specific time in the trial  
1122 and a specific inter-unit time lag. Response correlation matrices were estimated for  
1123 each pair of neurons and were subsequently z-transformed. Then, an averaged  
1124 correlation matrix was computed by averaging across all matrices.

1125

1126
